# Supplementary material for: RNA-Interference Components Are Dispensable for Transcriptional Silencing of the Drosophila Bithorax-Complex
Source: PubMed Central journal article supplement (PMC3681981; doi:10.1371/journal.pone.0065740), 2013-06-13
Supplement: pone.0065740.s005.pdf [file pone.0065740.s005.pdf]

**Table S1.****Primer sequences used in RT-PCR and ChIP analyses**

The position of PRE-specific primer pairs is given according to the coordinates of the *BX-C* sequence published previously [61]. Accession number #U31961.

| <b>PRE-specific primer pairs</b> |         | <b>Sequence (5'-3')</b> | <b>Position</b> |
|----------------------------------|---------|-------------------------|-----------------|
| <i>Fab-7-f9</i>                  | forward | ggttcggtaagaggtctac     | 83167-83185     |
|                                  | reverse | gaacttcacaacagacgacg    | 83621-83639     |
| <i>Fab-7-f9b</i>                 | forward | gaaaatgcccaacaaaatgc    | 83361-83380     |
|                                  | reverse | cgctgtctcgcctcttctc     | 83473-83492     |
| <i>Mcp-m6</i>                    | forward | acactcacacatgagacag     | 112305-112323   |
|                                  | reverse | ttgacggcaataactcaagg    | 112772-112790   |
| <i>Mcp-m6b</i>                   | forward | cccagagtctttggacttgc    | 112460-112479   |
|                                  | reverse | cataaagcgaggaacgaagg    | 112632-112651   |
| <i>bx-d-b2</i>                   | forward | agtgcggtgataaggctc      | 218802-218819   |
|                                  | reverse | gacaaaccattcagattcag    | 219389-219408   |
| <i>bx-d-b2b</i>                  | forward | gcactcaaaatccgaaaatg    | 219041-219060   |
|                                  | reverse | cacgtcagacttggaatagc    | 219168-219187   |
| <b>Other primer pairs</b>        |         | <b>Sequence (5'-3')</b> |                 |
| <i>AGO1</i>                      | forward | tgagcatcatcttccactgc    |                 |
|                                  | reverse | ctatggtgcatgcctatagc    |                 |
| <i>GAPDH1</i>                    | forward | aagggaatcctgggctacac    |                 |
|                                  | reverse | accgaactcgttgctgtacc    |                 |
| <i>Abd-B</i>                     | forward | gctagtccagcgattggaag    |                 |
|                                  | reverse | gtcggttggtcacacatcag    |                 |
| <i>Abd-a</i>                     | forward | caaatacaacgcaacccgagac  |                 |
|                                  | reverse | agcgcgtgttgctgctg       |                 |
| <i>Ubx</i>                       | forward | agtgtcagcggcggaac       |                 |
|                                  | reverse | agtctggtagaagtgagcccg   |                 |

Primers “b” generate shorter amplicons that have been used for qPCR analysis.

Primers for the *Intergenic control region* and the *Abd-B promoter* were described previously [44,62].
